# Supplementary material for: The role of olefin geometry in the activity of hydrocarbon stapled peptides targeting eukaryotic translation initiation factor 4E (eIF4E)
Source: Royal Society of Chemistry journal article supplement (doi:10.1039/c9ob01041f), 2019-01-01

## Supporting Information for

### The Role of Olefin Geometry in the Activity of Hydrocarbon Stapled Peptides Targeting Eukaryotic Translation Initiation Factor 4E (eIF4E)

James M. Song<sup>1</sup>, Erin E. Gallagher<sup>2</sup>, Arya Menon<sup>2</sup>, Lauren D. Mishra<sup>2</sup> and Amanda L. Garner\*<sup>1,2</sup>

<sup>1</sup>Program in Chemical Biology, University of Michigan, 210 Washtenaw Avenue, Ann Arbor, Michigan 48109, USA; <sup>2</sup>Department of Medicinal Chemistry, College of Pharmacy, University of Michigan, 428 Church Street, Ann Arbor, Michigan 48109, USA

|                                                   |               |
|---------------------------------------------------|---------------|
| <b>A. General Materials and Methods</b>           | Page S2       |
| <b>B. Peptide Synthesis</b>                       | Pages S2–S3   |
| <b>C. Circular Dichroism (CD) Spectroscopy</b>    | Page S3       |
| <b>D. Surface Plasmon Resonance (SPR)</b>         | Page S4       |
| <b>E. Cellular Assays</b>                         | Page S4       |
| <b>F. Supplemental Figures</b>                    | Pages S4–S10  |
| <b>G. References</b>                              | Page S10      |
| <b>H. Trunc-mHCS-4E-BP1-i and -ii NMR Spectra</b> | Pages S11–S12 |

## A. General Materials and Methods

*General chemistry methods.* RP-HPLC was performed using binary gradients of solvents A and B, where A is 0.1% HCO<sub>2</sub>H in water and B is 0.1% HCO<sub>2</sub>H in acetonitrile or 0.1% HCO<sub>2</sub>H in methanol. Analytical RP-HPLC was performed using an Agilent 1260 Infinity HPLC equipped with a ZORBAX Eclipse SB-C18 column (4.6 × 150 mm; 5 μm) at a flow rate of 1 mL/min, with detection at 214 and 254 nm. Preparative RP-HPLC was performed using an Agilent 1260 Infinity HPLC equipped with a PrepHT SB-C18 column (21.2 × 150 mm; 5 μm) at a flow rate of 18.6 mL/min, with detection at 214 and 254 nm. In all cases, fractions were analyzed off-line using an Agilent Q-TOF HPLC-MS. All peptides were purified to >95% homogeneity. Peptide stock concentrations were determined using amino acid analysis.

*General assay and biology methods.* SPR was performed using a SensiQ Pioneer instrument and a HisCap chip (three-dimensional hydrogel surface) with 3 channels in series. CD spectra were recorded on a Jasco I-1500 CD-Spectropolarimeter. IC<sub>50</sub> values were determined using PPI cat-ELCCA as reported; at least quadruplicates were performed for each peptide.<sup>1</sup> Chemiluminescence data was collected on a BioTek Cytation3. Gels were imaged on a ProteinSimple Fluorchem M Gel Imager. MDA-MB-231 and H1299 cells were a kind gift from Dr. Nouri Neamati. HCT116 cells were a kind gift from Dr. Judy Sebolt-Leopold. MDA-MB-231 cells were grown in RPMI-1640 media supplemented with 10% FBS (Atlanta Biologicals), 2 mM glutamine and 1% penicillin-streptomycin. H1299 cells were grown in RPMI-1640 media supplemented with 10% FBS and 2 mM glutamine. HCT116 cells were grown in McCoy's 5A media supplemented with 10% FBS and 2 mM glutamine. All cell lines were authenticated by STR profiling.

*Data and statistical analysis.* All data was analyzed using GraphPad Prism version 6.0c for Mac OS X (GraphPad Software, www.graphpad.com). Two-sided t-tests were performed using Prism; equal variance between samples being compared was established. Graphs show mean ± standard deviation as described in the figure legends.

*Materials.* Fmoc-protected amino acids and Rink amide MBHA resin were purchased from P3 Biosystems and used as received. Fmoc-(S)-2-(4-pentenyl)glycine-OH was purchased from Ark Pharm and used as received. eIF4E (9742), 4E-BP1 (9644) and eIF4G (2858) antibodies were purchased from Cell Signaling Technology.

## B. Peptide Synthesis

mHCS-4E-BP1 was synthesized on a 0.2-mmol scale in a 20-mL fritted syringe using MBHA Rink amide resin (0.2 – 0.4 mmol/g loading). In brief, the resin was swelled for 20 min at 25 °C in 1:1 solution of DMF and DCM. Fmoc groups were removed following the addition of a 20% piperidine/DMF solution (10 mL) and gentle agitation for a total of 20 min at 25 °C. After each Fmoc deprotection and amino acid couplings, the resin was thoroughly washed with NMP, CH<sub>2</sub>Cl<sub>2</sub>, and DMF. Amino acid couplings were performed by addition of amino acid (1 mmol) pre-activated with HBTU (0.9 mmol), *N,N*-diisopropylethylamine (2 mmol) in NMP (5 mL), and agitated for 2–3 h at 25 °C. The peptide was stapled on resin by bubbling nitrogen gas in a DCE solution of Grubbs I catalyst at 6 mM for at least two hours.<sup>2</sup> The reaction was monitored through 10–20 mg resin test cleavages via LC-MS. The procedure was repeated until the reaction went to complete conversion, usually after three replicates. After stapling, the *N*-terminus was acetylated, and the peptide was

cleaved from the resin using TFA/thioanisole/water/trisopropylsilane (90:4:4:2) for 4 h at 25 °C. The resulting solution was added to glacial ether (~200 mL) for peptide precipitation. The precipitates were then collected, dissolved, and purified via RP-HPLC. Fractions containing the desired peptide were confirmed by LC-MS, lyophilized, re-dissolved in 1:1 acetic acid/water, and lyophilized again. The peptide was dissolved in 33% DMF/water and peptide stock concentration was determined via amino acid analysis.

*mHCS-4E-BP1*. HRMS (ESI+) calcd for 2048.08, found 2049.10 [M+H].

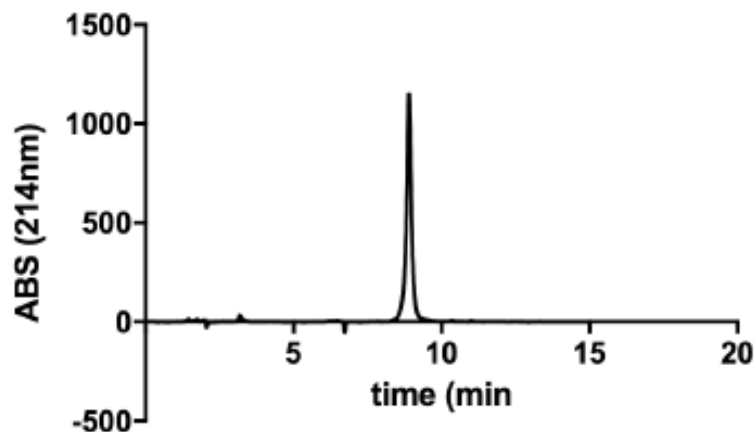

### C. Circular Dichroism (CD) Spectroscopy

Peptides were dissolved in buffer (5 mM sodium phosphate buffer, pH 7.4) at concentrations between 25–100  $\mu$ M. Data was collected between 180–260 nm with a step resolution of 0.1-nm and a speed of 50 nm/sec. Five accumulations were taken with the response time set to 1 s, bandwidth to 5 nm, and pathlength of 0.1 cm. The  $\alpha$ -helical content of each peptide was calculated by dividing the mean residue ellipticity  $[\varphi]_{222\text{obs}}$  by the theoretical  $[\varphi]_{222}$  for a helical acetylated peptide of equivalent length (see equations below).<sup>3</sup>

$$\text{Equation 1: } \%_H = (([\theta]_{\text{obs}222} - [\theta]_C) / ([\theta]_{\infty 222} - [\theta]_C)) * 100$$

$$\text{Equation 2: } [\theta]_C = 2220 - 53T$$

$$\text{Equation 3: } [\theta]_{\infty 222} = (-44000 + 250T) \left(1 - \frac{k}{N_p}\right)$$

$\%_H$  = percent  $\alpha$ -helix content,  $[\theta]_{\text{obs}222}$  = observed molar ellipticity at 222 nm

$[\theta]_C$  = Random coil molar ellipticity,  $[\theta]_{\infty 222}$  = Infinite molar  $\alpha$ -helix molar ellipticity

T = temperature in degrees Celsius, k = finite length correction

$N_p$  = Number of peptide units

## D. Surface Plasmon Resonance (SPR)

SPR was performed using a SensiQ Pioneer instrument and a HisCap chip (three-dimensional hydrogel surface) with 3 channels in series. Channel 1 was activated with NiCl<sub>2</sub> and 10×His-eIF4E<sup>4</sup> was immobilized by injection into the running buffer (10 mM HEPES-NaOH, pH 7.5, 225 mM NaCl, 10 mM imidazole, 0.1% Tween-20, and 5% Glycerol). The concentration was adjusted to about 600 RU. 50 μL of peptide was injected at 50 μL/min over a range of 10 concentrations in duplicate and random order (188 nM–4.0 μM) at 25 °C. The chip was regenerated in between each cycle with an injection 500 mM EDTA followed by reactivation with NiCl<sub>2</sub> and reimmobilization of 10×His-eIF4E. The association rate ( $k_a$ ), dissociation rate ( $k_d$ ), and binding constant ( $K_d$ ) were obtained by fitting to a 1:1 interaction model using global data analysis with the Qdat software, which employs the Levenberg-Marquardt non-linear regression algorithm. Triplicate analyses were performed.

## E. Cellular Assays

The cap pull-down assay was carried out as previously described.<sup>5,6</sup> Briefly, cells were grown in 6-cm dishes and treated with peptides (dissolved in 33% DMF/H<sub>2</sub>O) for 6 h. Cells were then lysed in cap pull-down buffer (50 mM HEPES-KOH (pH 7.5), 150 mM KCl, 1 mM EDTA, 2 mM DTT and 0.1% Tween 20) containing protease inhibitors. Cell lysate was centrifuged at 15,000 rpm for 25 min. The supernatant was subsequently incubated for 2 h at 4 °C with m<sup>7</sup>GDP-agarose resin. Beads were washed 3× with the cap pull-down buffer, 1× with TBS and 1× with water. Proteins were eluted by boiling in 2× LDS sample buffer for 10 min at 70 °C, resolved on a 4–12% Bis-Tris gel, and transferred to PVDF membrane in Towbin's Buffer. The membrane was blocked in 5% milk for 1 h at 25 °C, and then incubated with a primary antibody (overnight at 4 °C) and secondary antibody (1 h at 25 °C). Proteins were visualized by autoradiography. In all cases, the eIF4E level was used for normalization. Biological replicates were performed. Figures were formatted in Adobe Illustrator.

## F. Supplemental Figures

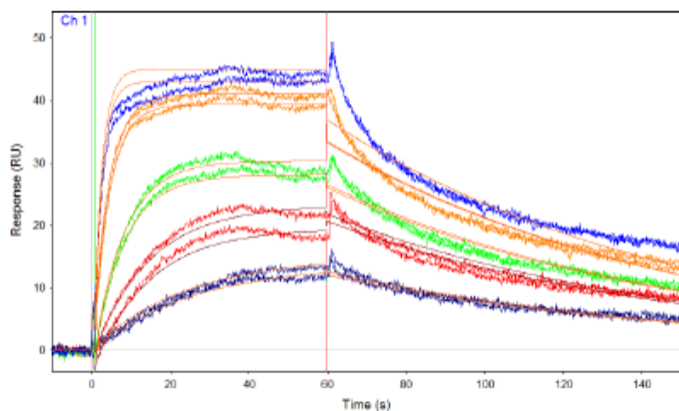

**Figure S1.** Representative sensorgram for **mHCS-4E-BP1** at 25 °C from duplicate runs at varying concentrations (62.5, 125, 250, 500 nM).

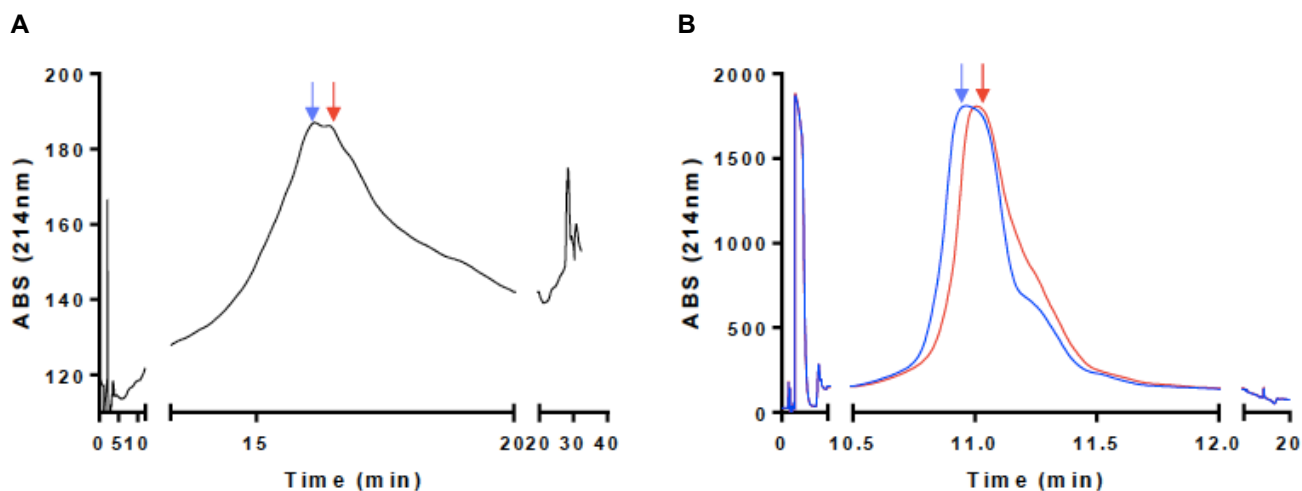

**Figure S2.** HPLC traces of **mHCS-4E-BP1** as (A) a mixture or (B) purified olefin isomers (blue = **mHCS-4E-BP1-i**; red = **mHCS-4E-BP1-ii**).

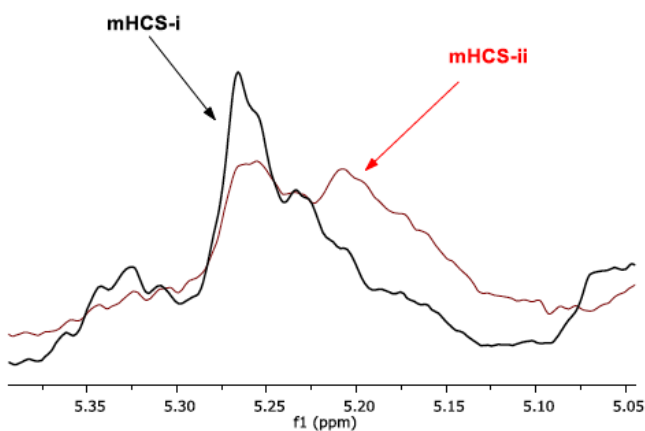

**Figure S3.** Overlaid  $^1\text{H}$  NMR spectra of **mHCS-4E-BP1-i** (black) and **mHCS-4E-BP1-ii** (red) in  $\text{D}_2\text{O}$  using a Varian NMR 500 MHz instrument. Significant water contamination and poor solubility yielded unresolvable olefinic peaks for both isomers. Of note, experiments in DMSO to aid solubility were also attempted; however, many problems were encountered due to peptide oxidation (Met, Cys) in this solvent precluding analysis.

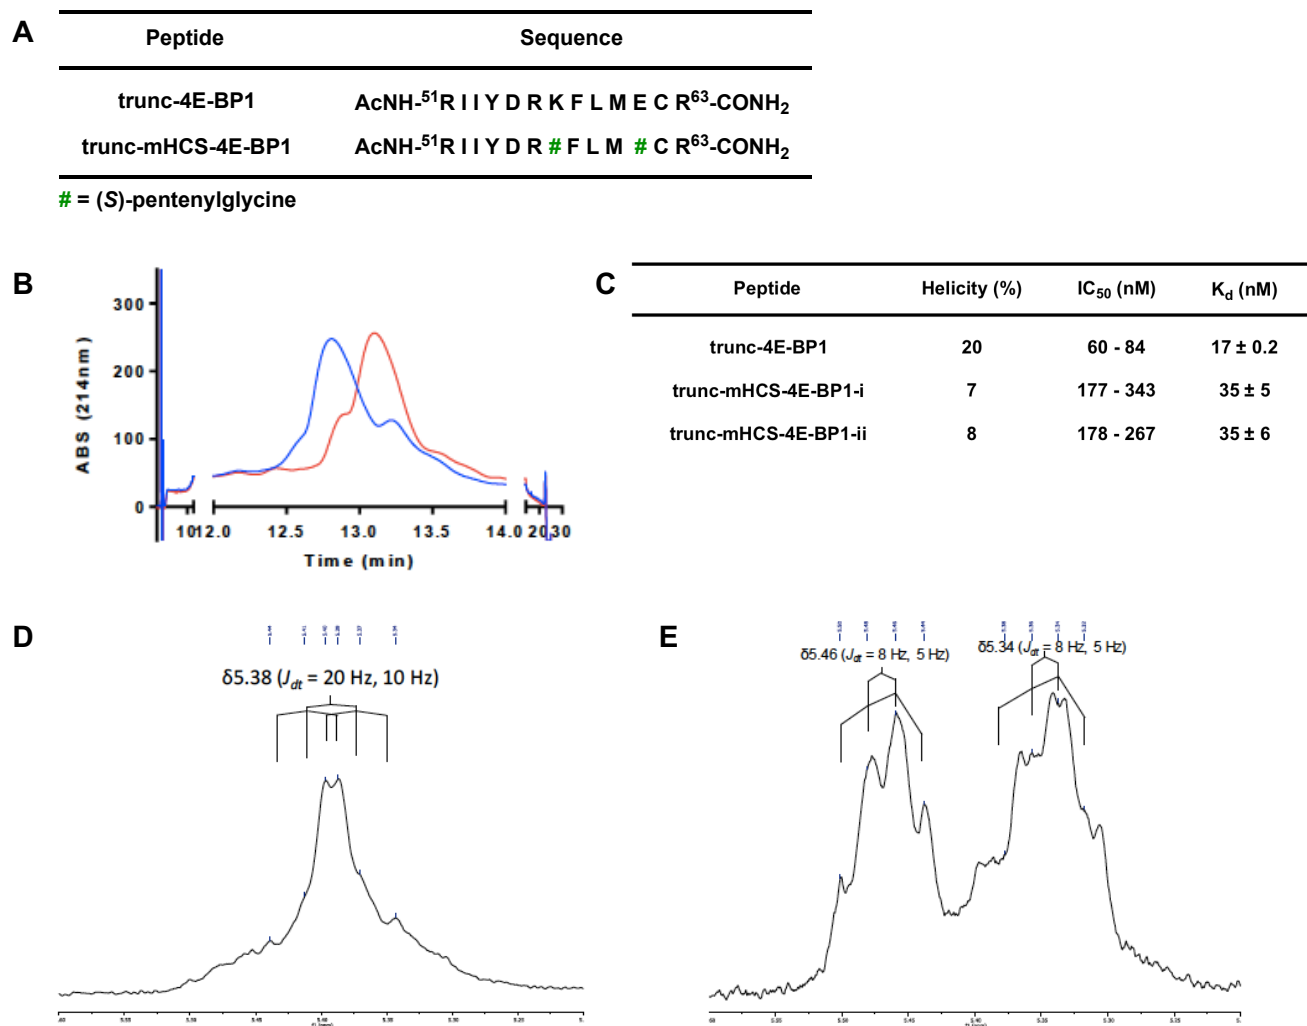

**Figure S4.** Truncated mHCS-4E-BP1 (trunc-mHCS-4E-BP1). (A) Sequence. (B) HPLC traces of trunc-mHCS-4E-BP1 isomers i (blue) and ii (red). (C) IC<sub>50</sub> values presented as 95% confidence intervals for trunc-4E-BP1, trunc-mHCS-4E-BP1-i and trunc-mHCS-4E-BP1-ii. Measurements were made using PPI cat-ELCCA. (D) and (E) <sup>1</sup>H NMR spectra of olefin regions in trunc-mHCS-4E-BP1-i and trunc-mHCS-4E-BP1-ii. Spectra were collected in D<sub>2</sub>O using a Varian NMR 500 MHz instrument.

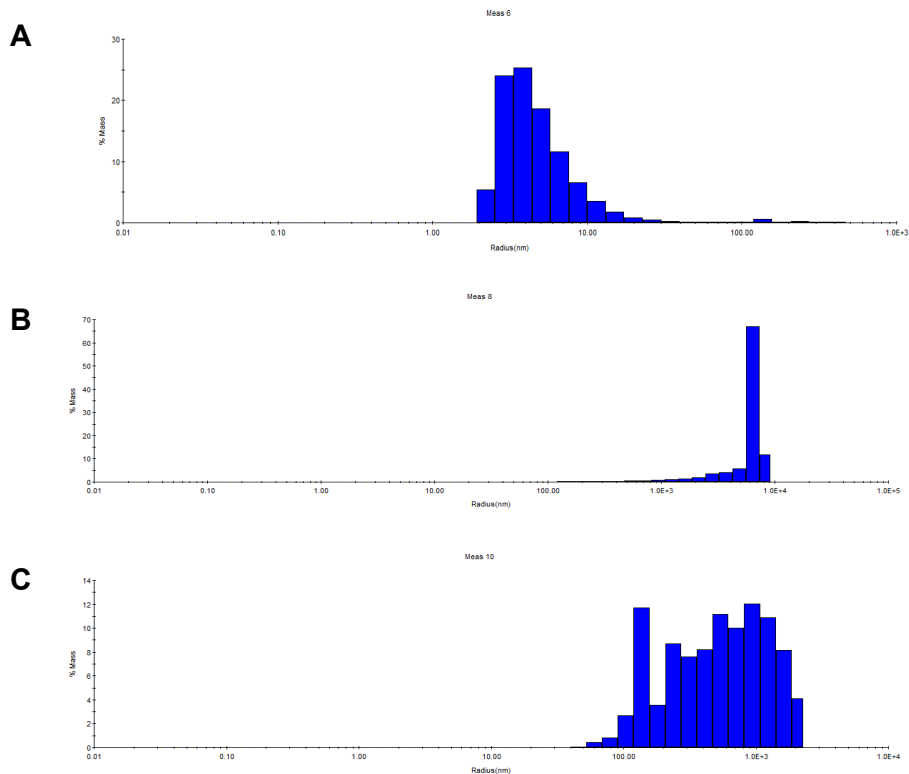

**Figure S5.** Dynamic light scattering (DLS) experiments with mHCS-4E-BP1. The following radii were measured at varying concentrations in water: (A) 30.5  $\mu\text{M}$ , radius = 63 nm; (B) 61  $\mu\text{M}$ , radius = 5900 nm; and (C) 122  $\mu\text{M}$ , radius = 1300 nm.

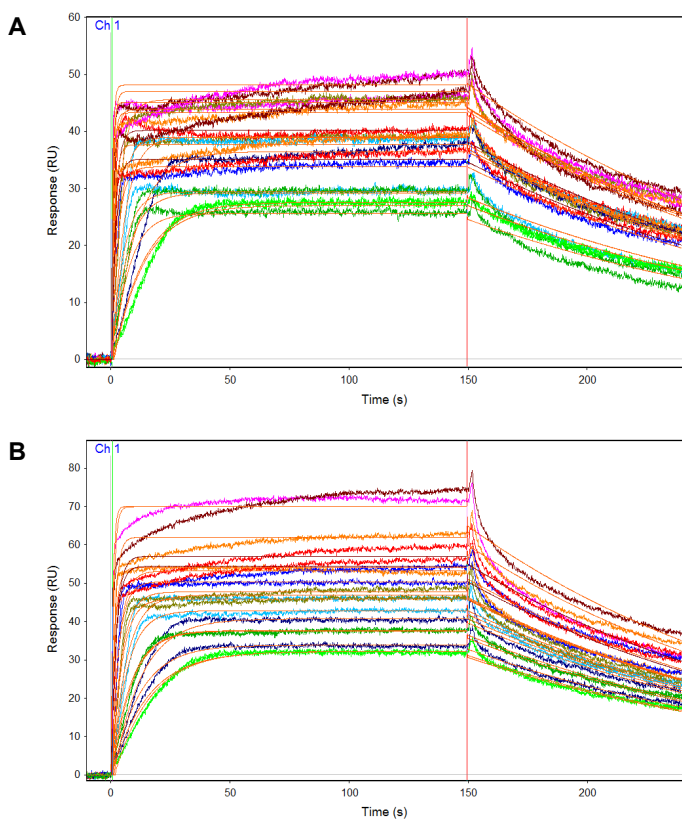

**Figure S6.** Representative sensorgrams for (A) **mHCS-4E-BP1-i** and (B) **mHCS-4E-BP1-ii** at 25 °C from duplicate runs at varying concentrations (62.5, 125, 250, 500 nM).

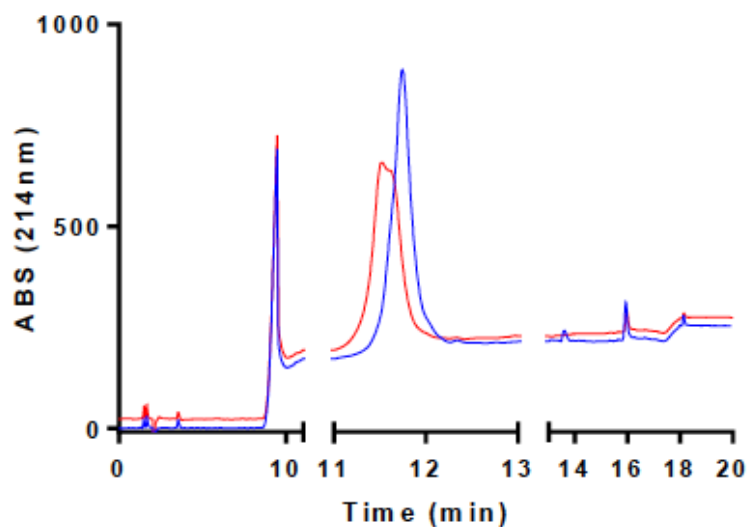

**Figure S7.** HPLC traces of **mHCS-4E-BP1** prepared using Grubbs I (red) or Grubbs II (blue) catalysts.



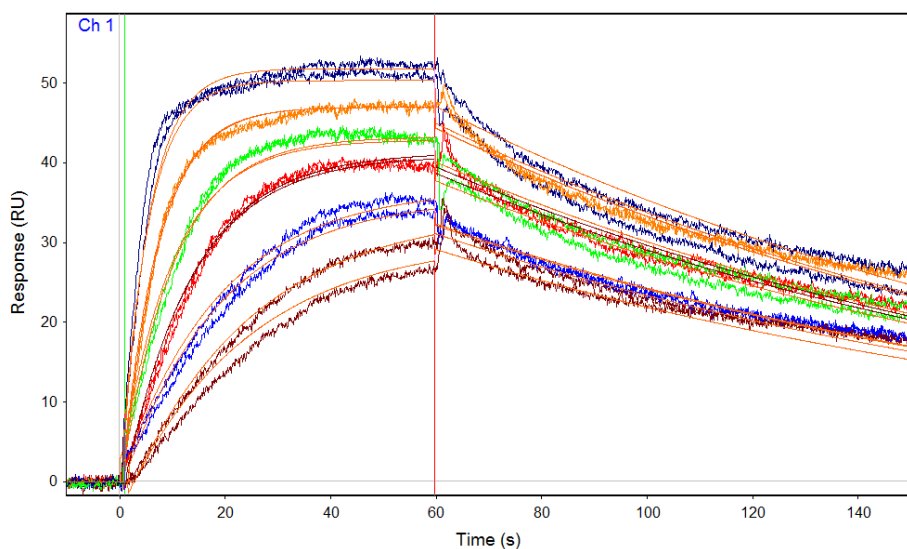

**Figure S8.** Representative sensorgram for **mHCS-4E-BP1** prepared using Grubbs II at 25 °C from duplicate runs at varying concentrations (62.5, 125, 250, 500 nM).

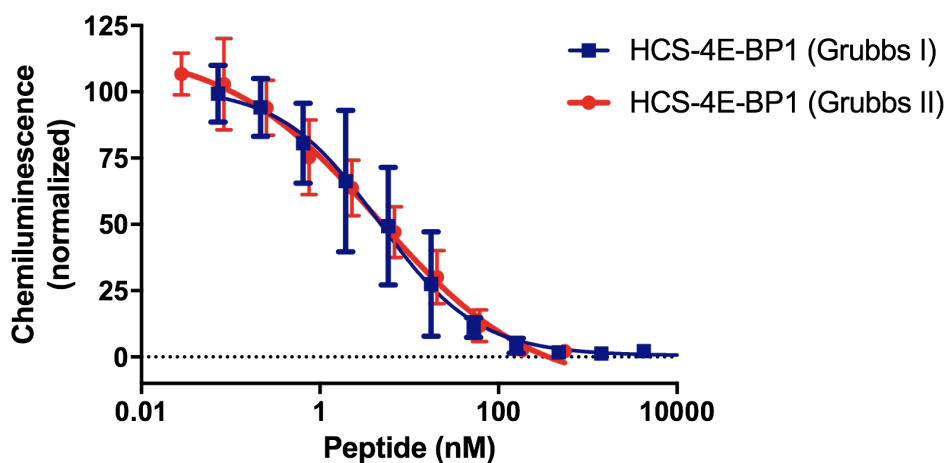

**Figure S9.**  $IC_{50}$  curves for **HCS-4E-BP1** prepared using either Grubbs I or II catalysts. Measured  $IC_{50}$  values as 95% confidence intervals were: 3.1–6.7 nM for Grubbs I and 2.7–7.2 nM for Grubbs II.

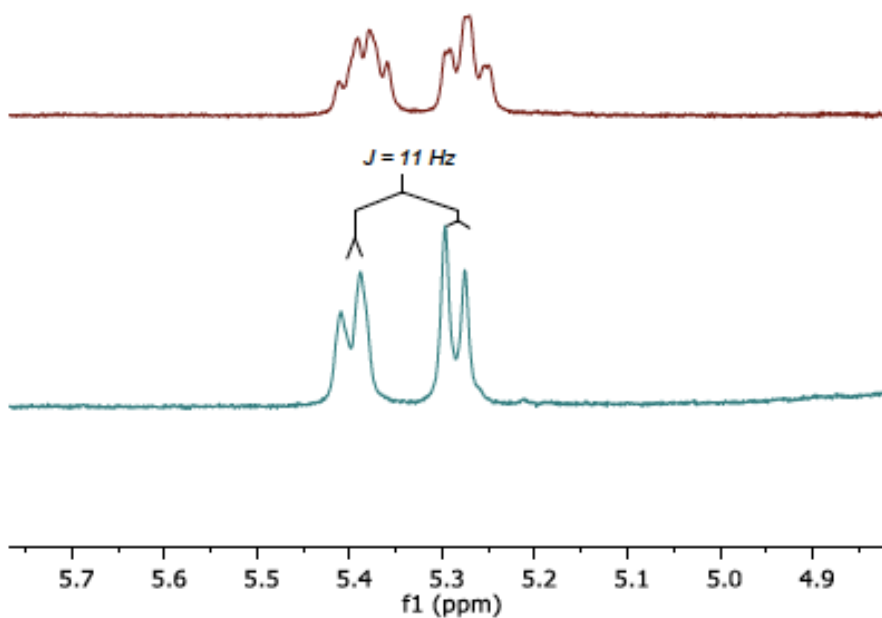

**Figure S10.** Stacked  $^1\text{H}$  NMR of **sTIP-04** (red) and homo-decoupling of the protons at a chemical shift of 2.0–1.8 ppm (blue) during the acquisition. The resulting coupling constant of 11 Hz suggests that **sTIP-04** is a *cis* isomer.

## G. References

1. J. M. Song, A. Menon, D. C. Mitchell, O. T. Johnson, A. L. Garner, *ACS Comb. Sci.* **2017**, *19*, 763–769.
2. Y. W. Kim, T. N. Grossman, G. L. Verdine, *Nat. Protoc.* **2011**, *6*, 761–771.
3. N. E. Shepherd, H. N. Hoang, G. Abbenante, D. P. Fairlie, *J. Am. Chem. Soc.* **2005**, *127*, 2974–2983.
4. E. E. Gallagher, J. M. Song, A. Menon, L. D. Mishra, A. Chmiel, A. L. Garner, *J. Med. Chem.* **2019**, *62*, 4967–4978.
5. I. Ederly, M. Altmann, N. Sonenberg, *Gene* **1988**, *74*, 517–525.
6. T. Kaur, A. Menon, A. L. Garner, *Eur. J. Med. Chem.* **2019**, *166*, 339–350.

## H. Trunc-mHCS-4E-BP1-i and -ii NMR Spectra

*Trunc-mHCS-4E-BP1-i* (D<sub>2</sub>O, 500 MHz):

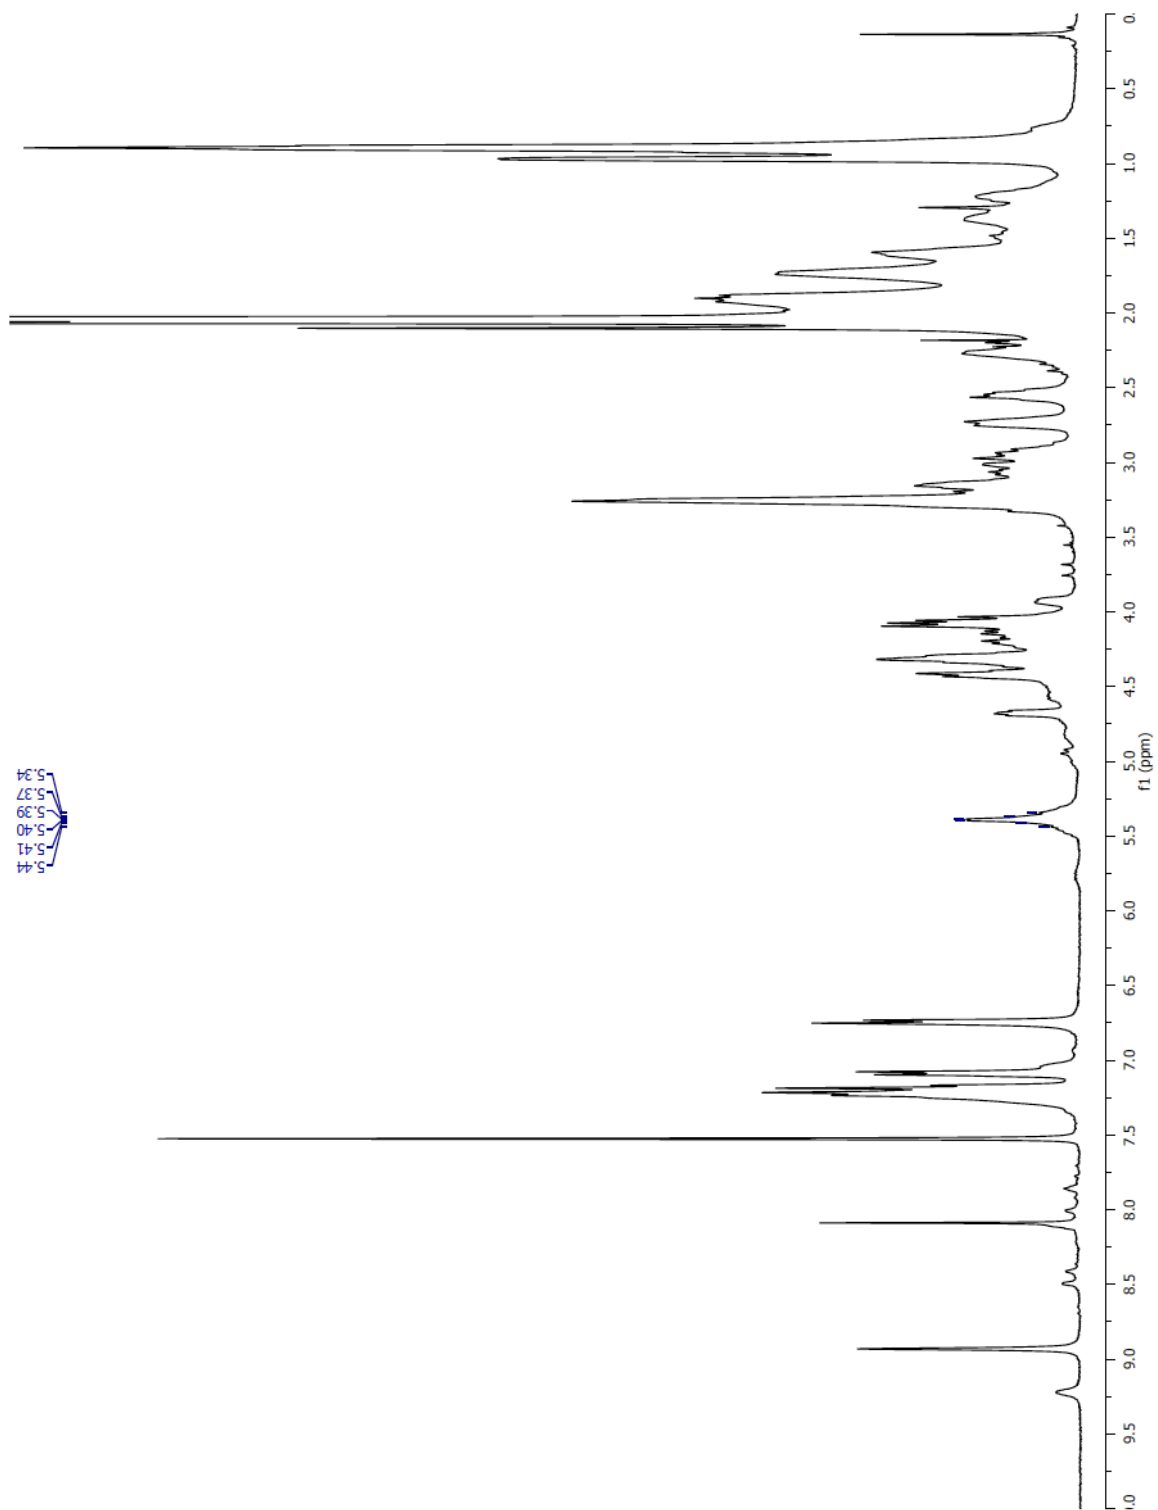

*Trunc-mHCS-4E-BP1-ii* (D<sub>2</sub>O, 500 MHz):

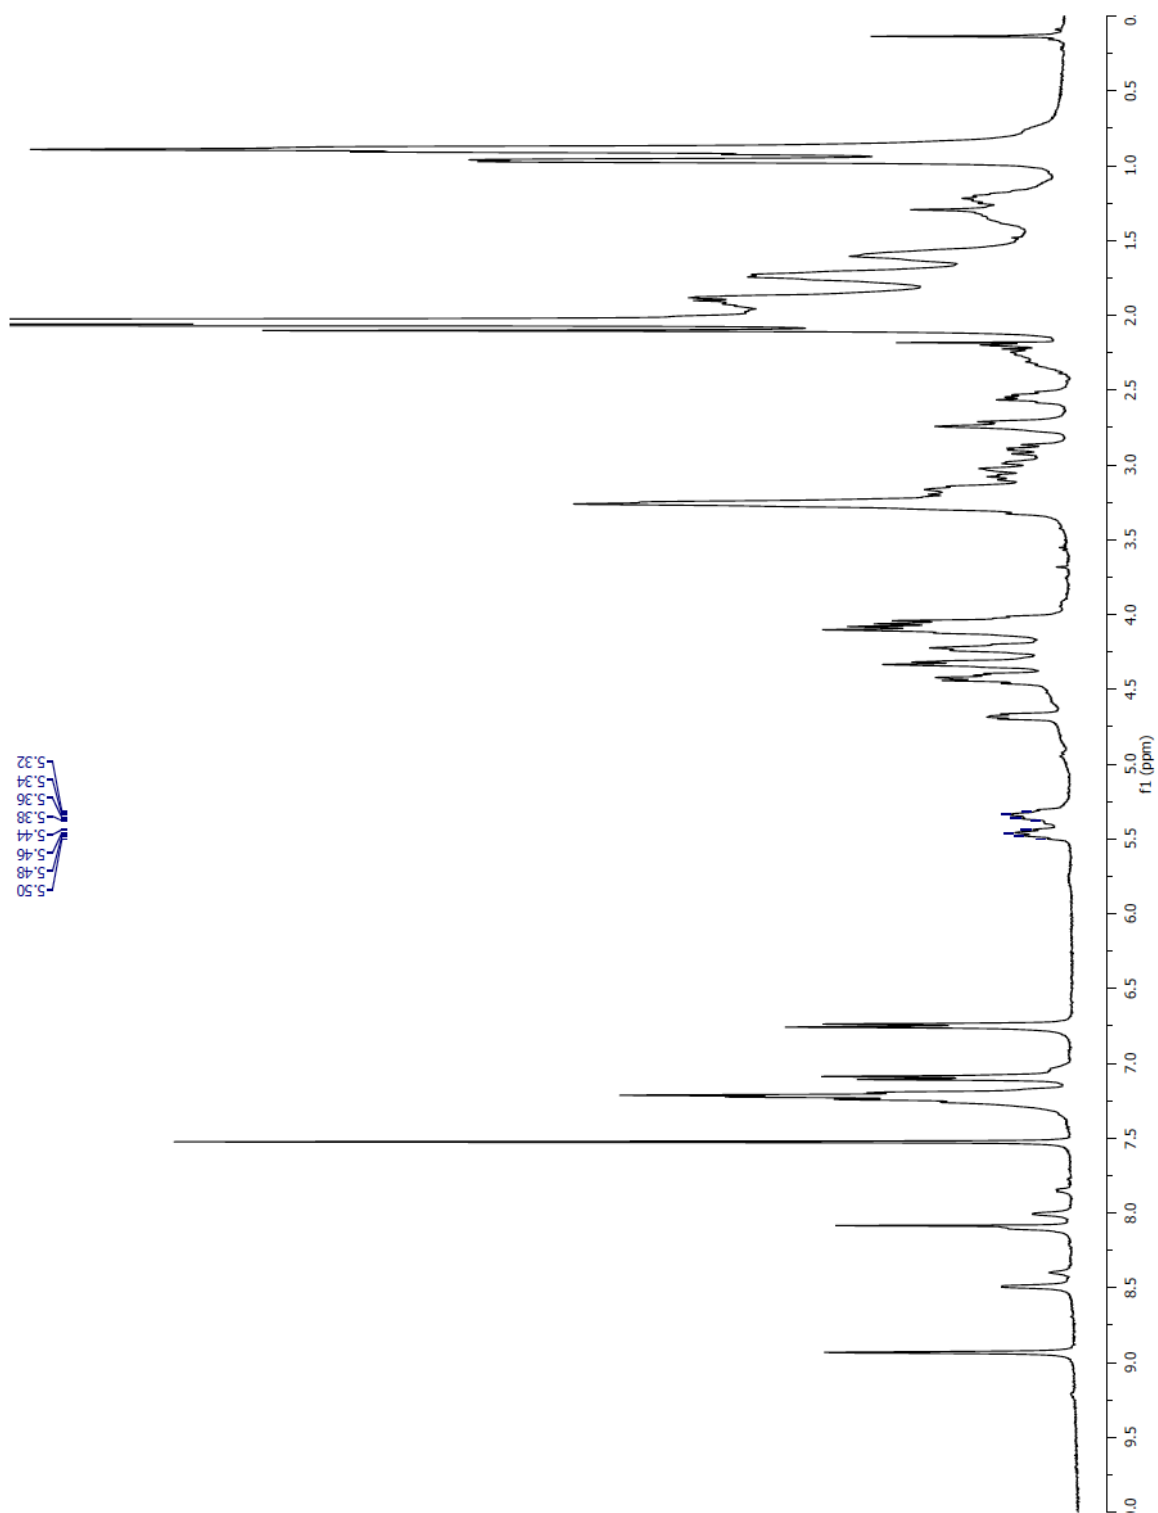

Supplement: c9ob01041f1.pdf [file c9ob01041f1.pdf]
